# Supplementary material for: Sex-Specific Association between Sodium Intake Estimated by 24-Hour Urinary Sodium Excretion and Nonalcoholic Fatty Liver Disease: The Community-Based Prospective Cohort Study
Source: MDPI journal article supplement (doi:10.3390/nu16040548), 2024-02-16
Supplement: s1 [file s1]

Supplementary Information.

**Sex-specific association between sodium intake assessed by 24-h urinary sodium excretion and nonalcoholic fatty liver disease: the Korean Genome and Epidemiology Study**

Jihye Lee<sup>1†</sup>, Ju-Yeon Lee<sup>2†</sup>, Yun-Jung Yang<sup>3\*</sup>

<sup>1</sup>Occupational Safety and Health Research Institute, Korea Occupational Safety and Health Agency, Ulsan 44429, Republic of Korea

<sup>2</sup>College of Medicine, Catholic Kwandong University, Gangneung-si 25601, Republic of Korea

<sup>3</sup>Department of Convergence Science, College of Medicine, Catholic Kwandong University International St. Mary's Hospital, Incheon 22711, Republic of Korea

\*Correspondence: [yangyj@ish.ac.kr](mailto:yangyj@ish.ac.kr)

†These authors contributed equally to this study.

Table S1. Baseline characteristics of male study participants ( $n = 1011$ ) according to 24-hour urinary sodium excretion

| Characteristics                         | Tertiles of 24-hour urinary sodium excretion<br>(mmol/day) |                           |                           | <i>p</i> -Value      |
|-----------------------------------------|------------------------------------------------------------|---------------------------|---------------------------|----------------------|
|                                         | T1 ( $n = 337$ )                                           | T2 ( $n = 337$ )          | T3 ( $n = 337$ )          |                      |
| 24-hour urinary sodium, mmol/day        | 129.63<br>(117.16–138.36)                                  | 160.99<br>(153.54–168.07) | 192.54<br>(182.89–206.84) | < 0.001 <sup>†</sup> |
| Age, yr                                 | 51 (44–59)                                                 | 52 (45–61)                | 53 (46–62)                | 0.002 <sup>†</sup>   |
| BMI, kg/m <sup>2</sup>                  | 22.82<br>(21.12–24.56)                                     | 23.29<br>(21.77–24.97)    | 23.62<br>(22.01–25.44)    | < 0.001 <sup>†</sup> |
| Drinking status, $n$ (%)                |                                                            |                           |                           | 0.549                |
| Never                                   | 87 (25.82)                                                 | 88 (26.11)                | 85 (25.22)                |                      |
| Former                                  | 42 (12.46)                                                 | 54 (16.02)                | 41 (12.17)                |                      |
| Current                                 | 208 (61.72)                                                | 195 (57.86)               | 211 (62.61)               |                      |
| Smoking status, $n$ (%)                 |                                                            |                           |                           | < 0.001              |
| Never                                   | 58 (17.21)                                                 | 81 (24.04)                | 97 (28.78)                |                      |
| Former                                  | 78 (23.15)                                                 | 89 (26.41)                | 99 (29.38)                |                      |
| Current                                 | 201 (59.64)                                                | 167 (49.55)               | 141 (41.84)               |                      |
| Physical activity, MET–h/week           | 17.87<br>(8.25–36.87)                                      | 20.25<br>(9.75–36.87)     | 20.37<br>(9.75–36.37)     | 0.173 <sup>†</sup>   |
| AST, IU/L                               | 23 (19–28)                                                 | 22 (19–27)                | 22 (20–27)                | 0.486 <sup>†</sup>   |
| ALT, IU/L                               | 20 (16–27)                                                 | 20 (15–25)                | 20 (16–25)                | 0.283 <sup>†</sup>   |
| TG, mg/dL                               | 122 (88–173)                                               | 130 (93–180)              | 133 (96–203)              | 0.014 <sup>†</sup>   |
| T-Chol, mg/dL                           | 192 (168–213)                                              | 192 (168–213)             | 186 (167–208)             | 0.114 <sup>†</sup>   |
| Albumin, g/dL                           | 4.5 (4.3–4.7)                                              | 4.5 (4.3–4.6)             | 4.5 (4.3–4.7)             | 0.069 <sup>†</sup>   |
| Urine potassium, mmol/L                 | 59 (39–90)                                                 | 44 (32–66)                | 41 (28–57)                | < 0.001 <sup>†</sup> |
| HOMA–IR                                 | 1.33 (0.96–1.74)                                           | 1.30 (0.92–1.90)          | 1.38 (0.96–2.00)          | 0.110 <sup>†</sup>   |
| eGFR, CKD–EPI, l/min/1.73m <sup>2</sup> | 99.61<br>(87.02–107.79)                                    | 100.99<br>(93.41–108.14)  | 102.89<br>(94.78–108.48)  | < 0.001 <sup>†</sup> |
| Hypertension, $n$ (%)                   | 88 (26.11)                                                 | 100 (29.67)               | 131 (38.87)               | 0.001                |
| Diabetes mellitus, $n$ (%)              | 15 (4.45)                                                  | 18 (5.34)                 | 25 (7.42)                 | 0.236                |
| Hyperlipidemia, $n$ (%)                 | 181 (53.71)                                                | 188 (55.79)               | 175 (51.93)               | 0.603                |
| Total energy, kcal                      | 1893.2<br>(1581.7–2249.5)                                  | 1969.4<br>(1595.7–2374.7) | 2047.5<br>(1696.7–2627.3) | < 0.001 <sup>†</sup> |
| Protein, g                              | 61.32<br>(47.74–76.73)                                     | 64.27<br>(50.90–82.11)    | 67.98<br>(54.07–88.44)    | < 0.001 <sup>†</sup> |
| Fat, g                                  | 30.17<br>(20.48–41.43)                                     | 31.40<br>(21.08–41.81)    | 33.47<br>(22.29–47.43)    | 0.001 <sup>†</sup>   |

|                 |                           |                           |                           |                      |
|-----------------|---------------------------|---------------------------|---------------------------|----------------------|
| Carbohydrate, g | 338.34<br>(285.97–393.97) | 345.34<br>(286.01–415.32) | 355.03<br>(303.81–448.06) | < 0.001 <sup>†</sup> |
|-----------------|---------------------------|---------------------------|---------------------------|----------------------|

Continuous variables are presented as medians (interquartile ranges). Categorical variables are presented as numbers (%). Analysis of variance tests were used for continuous variables and Chi-squared test for categorical variables that were normally distributed. <sup>†</sup> Kruskal–Wallis test was performed for continuous variables.

T1, lowest tertile; T2, middle tertile; T3, highest tertile; BMI, body mass index; eGFR, estimated glomerular filtration rate; CKD–EPI, chronic kidney disease epidemiology collaboration; HOMA–IR, homeostasis model assessment of insulin resistance; MET, metabolic equivalent of task; AST, aspartate aminotransferase; ALT, alanine aminotransferase; TG, triglyceride; T–Chol, total cholesterol

Table S2. Baseline characteristics of female study participants ( $n = 1571$ ) according to 24-h urinary sodium excretion

| Characteristics                          | Tertiles of 24-hour urinary sodium excretion<br>(mmol/day) |                           |                           | <i>p</i> -Value      |
|------------------------------------------|------------------------------------------------------------|---------------------------|---------------------------|----------------------|
|                                          | T1 ( $n = 524$ )                                           | T2 ( $n = 524$ )          | T3 ( $n = 523$ )          |                      |
| 24-hour urinary sodium, mmol/day         | 129.03<br>(114.40–138.75)                                  | 160.20<br>(152.68–166.82) | 193.14<br>(182.58–210.16) | < 0.001 <sup>†</sup> |
| Age, yr                                  | 48 (43–59)                                                 | 50 (44–61)                | 53 (45–61)                | < 0.001 <sup>†</sup> |
| BMI, kg/m <sup>2</sup>                   | 23.07<br>(21.51–24.65)                                     | 23.69<br>(21.94–25.05)    | 24.02<br>(22.74–25.30)    | < 0.001 <sup>†</sup> |
| Drinking status, $n$ (%)                 |                                                            |                           |                           | 0.438                |
| Never                                    | 402 (76.72)                                                | 384 (73.28)               | 402 (76.86)               |                      |
| Former                                   | 16 (3.05)                                                  | 12 (2.29)                 | 13 (2.49)                 |                      |
| Current                                  | 106 (20.23)                                                | 128 (24.43)               | 108 (20.65)               |                      |
| Smoking status, $n$ (%)                  |                                                            |                           |                           | 0.669                |
| Never                                    | 497 (94.85)                                                | 504 (96.18)               | 505 (96.56)               |                      |
| Former                                   | 4 (0.76)                                                   | 4 (0.76)                  | 3 (0.57)                  |                      |
| Current                                  | 23 (4.39)                                                  | 16 (3.05)                 | 15 (2.87)                 |                      |
| Physical activity, MET–h/week            | 16.43<br>(9.81–27.25)                                      | 17.00<br>(9.37–30.18)     | 18.75<br>(11.00–31.62)    | 0.029 <sup>†</sup>   |
| AST, IU/L                                | 19 (17–23)                                                 | 20 (17–24)                | 19 (17–23)                | 0.414 <sup>†</sup>   |
| ALT, IU/L                                | 14 (12–18)                                                 | 15 (12–19)                | 15 (12–18)                | 0.028 <sup>†</sup>   |
| TG, mg/dL                                | 96.5 (72–135)                                              | 103.5 (76–148)            | 115 (82–162)              | < 0.001 <sup>†</sup> |
| T-Chol, mg/dL                            | 187 (154–214.5)                                            | 192 (171–215.5)           | 193 (173–219)             | 0.004 <sup>†</sup>   |
| Albumin, g/dL                            | 4.4 (4.2–4.5)                                              | 4.4 (4.2–4.5)             | 4.4 (4.2–4.5)             | 0.413 <sup>†</sup>   |
| Urine potassium, mmol/L                  | 53 (32–77)                                                 | 43 (30–64)                | 37 (26–55)                | < 0.001 <sup>†</sup> |
| HOMA–IR                                  | 1.43 (1.06–2.02)                                           | 1.55 (1.09–2.13)          | 1.53 (1.12–2.12)          | 0.016 <sup>†</sup>   |
| eGFR, CKD–EPI, ml/min/1.73m <sup>2</sup> | 104.65<br>(94.80–112.03)                                   | 105.28<br>(95.32–111.37)  | 103.99<br>(97.10–110.69)  | 0.366                |
| Hypertension, $n$ (%)                    | 114 (21.76)                                                | 137 (26.15)               | 165 (31.55)               | 0.002                |
| Diabetes mellitus, $n$ (%)               | 15 (2.86)                                                  | 10 (1.91)                 | 17 (3.25)                 | 0.383                |
| Hyperlipidemia, $n$ (%)                  | 256 (48.85)                                                | 254 (48.47)               | 259 (49.52)               | 0.943                |
| Postmenopausal, $n$ (%)                  | 290 (55.34)                                                | 312 (59.54)               | 350 (66.92)               | 0.001                |
| Total energy, kcal                       | 1730.8<br>(1423.9–2139.0)                                  | 1841.8<br>(1483.5–2273.0) | 1870.2<br>(1540.4–2244.6) | 0.062                |
| Protein, g                               | 57.53<br>(43.50–74.45)                                     | 60.24<br>(44.81–77.79)    | 60.84<br>(47.91–77.68)    | 0.005 <sup>†</sup>   |

|                 |                           |                           |                           |                      |
|-----------------|---------------------------|---------------------------|---------------------------|----------------------|
| Fat, g          | 25.17<br>(16.81–36.07)    | 25.55<br>(16.94–36.93)    | 25.53<br>(17.81–36.48)    | 0.104 <sup>†</sup>   |
| Carbohydrate, g | 313.41<br>(260.77–384.44) | 328.79<br>(275.60–399.83) | 337.36<br>(284.89–405.91) | < 0.001 <sup>†</sup> |

Continuous variables are presented as medians (interquartile ranges). Categorical variables are presented as numbers (%). Analysis of variance tests were used for continuous variables and Chi-squared test for categorical variables that were normally distributed. <sup>†</sup> Kruskal–Wallis test was performed for continuous variables.

T1, lowest tertile; T2, middle tertile; T3, highest tertile; BMI, body mass index; eGFR, estimated glomerular filtration rate; CKD–EPI, chronic kidney disease epidemiology collaboration; HOMA–IR, homeostasis model assessment of insulin resistance; MET, metabolic equivalent of task; AST, aspartate aminotransferase; ALT, alanine aminotransferase; TG, triglyceride; T–Chol, total cholesterol

Table S3. Risk factors for the incidence of NAFLD in all subjects ( $n = 2582$ ) according to 24-hour urinary sodium excretion

|                                          | Univariate       |                 | Multivariate     |                 |
|------------------------------------------|------------------|-----------------|------------------|-----------------|
|                                          | HR (95% CI)      | <i>p</i> -Value | HR (95% CI)      | <i>p</i> -Value |
| Age, yr                                  | 0.98 (0.97–0.99) | 0.002           | 0.96 (0.94–0.97) | < 0.001         |
| BMI, kg/m <sup>2</sup>                   | 1.64 (1.56–1.72) | < 0.001         | –                | –               |
| Drinking status, <i>n</i> (%)            |                  |                 |                  |                 |
| Never                                    | Ref              |                 | –                | –               |
| Former                                   | 0.81 (0.56–1.19) | 0.296           | –                | –               |
| Current                                  | 0.89 (0.74–1.06) | 0.213           | –                | –               |
| Smoking status, <i>n</i> (%)             |                  |                 |                  |                 |
| Never                                    | Ref              |                 | Ref              |                 |
| Former                                   | 0.85 (0.64–1.13) | 0.289           | 0.92 (0.63–1.34) | 0.677           |
| Current                                  | 0.71 (0.56–0.90) | 0.005           | 0.89 (0.64–1.22) | 0.482           |
| Physical activity, MET-h/week            | 0.99 (0.99–1.00) | 0.624           | –                | –               |
| TG, mg/dL                                | 1.00 (1.00–1.00) | < 0.001         | 1.00 (1.00–1.00) | < 0.001         |
| T-Chol, mg/dL                            | 1.00 (1.00–1.00) | 0.004           | 1.00 (0.99–1.00) | 0.612           |
| Albumin, g/dL                            | 1.52 (1.07–2.18) | 0.019           | 1.21 (0.81–1.81) | 0.349           |
| Urine potassium, mmol/L                  | 1.00 (0.99–1.00) | 0.746           | –                | –               |
| HOMA-IR                                  | 1.08 (1.03–1.13) | < 0.001         | 1.07 (1.02–1.12) | 0.006           |
| eGFR, CKD-EPI, ml/min/1.73m <sup>2</sup> | 0.99 (0.98–0.99) | 0.016           | 0.98 (0.97–0.99) | < 0.001         |
| Hypertension, <i>n</i> (%)               | 1.25 (1.04–1.50) | 0.017           | 1.30 (1.07–1.59) | 0.007           |
| Diabetes mellitus, <i>n</i> (%)          | 2.23 (1.57–3.16) | < 0.001         | –                | –               |
| Hyperlipidemia, <i>n</i> (%)             | 1.24 (1.04–1.48) | 0.012           | 1.05 (0.84–1.31) | 0.634           |
| Postmenopausal, <i>n</i> (%)             | 0.96 (0.77–1.19) | 0.737           | 1.10 (0.83–1.45) | 0.489           |
| Total energy, kcal                       | 0.99 (0.99–1.00) | 0.377           | –                | –               |
| Protein, g                               | 0.99 (0.99–1.00) | 0.586           | –                | –               |
| Fat, g                                   | 0.99 (0.99–1.00) | 0.491           | –                | –               |
| Carbohydrate, g                          | 0.99 (0.99–1.00) | 0.412           | –                | –               |

Variables with *p*-values < 0.10 in the univariate analysis were included in the multivariate analysis. BMI and DM were not considered in multivariate analysis because they were used for NAFLD classification.

NAFLD, nonalcoholic fatty liver disease; HR, hazard ratio; CI, confidence interval; BMI, body mass index; eGFR, estimated glomerular filtration rate; CKD-EPI, chronic kidney disease epidemiology collaboration; HOMA-IR, homeostasis model assessment of insulin resistance; MET, metabolic equivalent of task; AST, aspartate aminotransferase; ALT, alanine aminotransferase; TG, triglyceride; T-Chol, total cholesterol

Table S4. Risk factors for the incidence of NAFLD in males ( $n = 1011$ ) according to 24-hour urinary sodium excretion

|                                          | Univariate       |                 | Multivariate     |                 |
|------------------------------------------|------------------|-----------------|------------------|-----------------|
|                                          | HR (95% CI)      | <i>p</i> -Value | HR (95% CI)      | <i>p</i> -Value |
| Age, yr                                  | 0.96 (0.94–0.98) | < 0.001         | 0.95 (0.93–0.97) | < 0.001         |
| BMI, kg/m <sup>2</sup>                   | 1.62 (1.50–1.74) | < 0.001         | –                | –               |
| Drinking status, <i>n</i> (%)            |                  |                 |                  |                 |
| Never                                    | Ref              |                 | –                | –               |
| Former                                   | 0.94 (0.57–1.56) | 0.831           | –                | –               |
| Current                                  | 0.95 (0.67–1.34) | 0.779           | –                | –               |
| Smoking status, <i>n</i> (%)             |                  |                 |                  |                 |
| Never                                    | Ref              |                 | –                | –               |
| Former                                   | 1.24 (0.82–1.89) | 0.299           | –                | –               |
| Current                                  | 1.04 (0.71–1.54) | 0.810           | –                | –               |
| Physical activity, MET–h/week            | 0.99 (0.98–1.00) | 0.156           | –                | –               |
| TG, mg/dL                                | 1.00 (1.00–1.00) | < 0.001         | 1.00 (1.00–1.00) | 0.002           |
| T-Chol, mg/dL                            | 1.00 (0.99–1.00) | 0.055           | 1.00 (0.99–1.00) | 0.574           |
| Albumin, g/dL                            | 2.38 (1.31–4.30) | 0.004           | 1.13 (0.57–2.22) | 0.713           |
| Urine potassium, mmol/L                  | 0.99 (0.99–1.00) | 0.898           | –                | –               |
| HOMA–IR                                  | 1.12 (1.03–1.21) | 0.004           | 1.12 (1.02–1.23) | 0.013           |
| eGFR, CKD–EPI, ml/min/1.73m <sup>2</sup> | 0.98 (0.97–1.00) | 0.063           | 0.97 (0.96–0.99) | < 0.001         |
| Hypertension, <i>n</i> (%)               | 1.21 (0.88–1.66) | 0.227           | –                | –               |
| Diabetes mellitus, <i>n</i> (%)          | 2.93 (1.85–4.62) | < 0.001         | –                | –               |
| Hyperlipidemia, <i>n</i> (%)             | 1.36 (1.00–1.84) | 0.047           | 1.02 (0.69–1.49) | 0.912           |
| Total energy, kcal                       | 1.00 (0.99–1.00) | 0.901           | –                | –               |
| Protein, g                               | 1.00 (0.99–1.00) | 0.744           | –                | –               |
| Fat, g                                   | 0.99 (0.99–1.00) | 0.886           | –                | –               |
| Carbohydrate, g                          | 1.00 (0.99–1.00) | 0.768           | –                | –               |

Variables with *p*-values < 0.10 in the univariate analysis were included in the multivariate analysis. BMI and DM were not considered in multivariate analysis because they were used for NAFLD classification.

NAFLD, nonalcoholic fatty liver disease; HR, hazard ratio; CI, confidence interval; BMI, body mass index; eGFR, estimated glomerular filtration rate; CKD–EPI, chronic kidney disease epidemiology collaboration; HOMA–IR, homeostasis model assessment of insulin resistance; MET, metabolic equivalent of task; AST, aspartate aminotransferase; ALT, alanine aminotransferase; TG, triglyceride; T-Chol, total cholesterol

Table S5. Risk factors for the incidence of NAFLD in females ( $n = 1571$ ) according to 24-hour urinary sodium excretion

|                                          | Univariate       |                 | Multivariate     |                 |
|------------------------------------------|------------------|-----------------|------------------|-----------------|
|                                          | HR (95% CI)      | <i>p</i> -Value | HR (95% CI)      | <i>p</i> -Value |
| Age, yr                                  | 0.99 (0.98–1.00) | 0.417           | –                | –               |
| BMI, kg/m <sup>2</sup>                   | 1.66 (1.57–1.77) | < 0.001         | –                | –               |
| Drinking status, <i>n</i> (%)            |                  |                 |                  |                 |
| Never                                    | Ref              |                 | –                | –               |
| Former                                   | 0.97 (0.45–2.05) | 0.938           | –                | –               |
| Current                                  | 1.05 (0.82–1.35) | 0.681           | –                | –               |
| Smoking status, <i>n</i> (%)             |                  |                 |                  |                 |
| Never                                    | Ref              |                 | Ref              | –               |
| Former                                   | 0.38 (0.05–2.72) | 0.337           | 0.42 (0.05–2.99) | 0.387           |
| Current                                  | 0.43 (0.18–1.05) | 0.067           | 0.42 (0.17–1.03) | 0.060           |
| Physical activity, MET-h/week            | 1.00 (0.99–1.00) | 0.408           | –                | –               |
| TG, mg/dL                                | 1.00 (1.00–1.00) | < 0.001         | 1.00 (1.00–1.00) | 0.005           |
| T-Chol, mg/dL                            | 1.00 (0.99–1.00) | 0.041           | 1.00 (0.99–1.00) | 0.983           |
| Albumin, g/dL                            | 1.60 (0.99–2.58) | 0.055           | 1.37 (0.83–2.26) | 0.205           |
| Urine potassium, mmol/L                  | 1.00 (0.99–1.00) | 0.422           | –                | –               |
| HOMA-IR                                  | 1.06 (1.01–1.12) | 0.019           | 1.04 (0.98–1.10) | 0.120           |
| eGFR, CKD-EPI, ml/min/1.73m <sup>2</sup> | 0.99 (0.98–0.99) | 0.033           | 0.99 (0.98–1.00) | 0.136           |
| Hypertension, <i>n</i> (%)               | 1.30 (1.03–1.63) | 0.023           | 1.12 (0.88–1.42) | 0.334           |
| Diabetes mellitus, <i>n</i> (%)          | 1.85 (1.06–3.22) | 0.030           | –                | –               |
| Hyperlipidemia, <i>n</i> (%)             | 1.21 (0.98–1.50) | 0.063           | 1.03 (0.78–1.36) | 0.819           |
| Postmenopausal, <i>n</i> (%)             | 0.96 (0.78–1.19) | 0.749           | –                | –               |
| Total energy, kcal                       | 0.99 (0.99–1.00) | 0.426           | –                | –               |
| Protein, g                               | 0.99 (0.99–1.00) | 0.559           | –                | –               |
| Fat, g                                   | 0.99 (0.99–1.00) | 0.812           | –                | –               |
| Carbohydrate, g                          | 0.99 (0.99–1.00) | 0.419           | –                | –               |

Variables with *p*-values < 0.10 in the univariate analysis were included in the multivariate analysis. BMI and DM were not considered in multivariate analysis because they were used for NAFLD classification.

NAFLD, nonalcoholic fatty liver disease; HR, hazard ratio; CI, confidence interval; BMI, body mass index; eGFR, estimated glomerular filtration rate; CKD-EPI, chronic kidney disease epidemiology collaboration; HOMA-IR, homeostasis model assessment of insulin resistance; MET, metabolic equivalent of task; AST, aspartate aminotransferase; ALT, alanine aminotransferase; TG, triglyceride; T-Chol, total cholesterol



Table S6. Risk factors for the incidence of hepatic fibrosis in all subjects ( $n = 2582$ ) according to 24-hour urinary sodium excretion

|                                          | Univariate       |                 | Multivariate     |                 |
|------------------------------------------|------------------|-----------------|------------------|-----------------|
|                                          | HR (95% CI)      | <i>p</i> -Value | HR (95% CI)      | <i>p</i> -Value |
| Age, yr                                  | 1.06 (1.04–1.08) | < 0.001         | –                | –               |
| Gender (women), <i>n</i> (%)             | 1.04 (0.72–1.51) | 0.814           |                  |                 |
| BMI, kg/m <sup>2</sup>                   | 1.64 (1.49–1.80) | < 0.001         | –                | –               |
| Drinking status, <i>n</i> (%)            |                  |                 |                  |                 |
| Never                                    | Ref              |                 | –                | –               |
| Former                                   | 1.23 (0.61–2.47) | 0.560           | –                | –               |
| Current                                  | 1.09 (0.72–1.55) | 0.756           | –                | –               |
| Smoking status, <i>n</i> (%)             |                  |                 |                  |                 |
| Never                                    | Ref              |                 | –                | –               |
| Former                                   | 1.24 (0.72–2.12) | 0.427           | –                | –               |
| Current                                  | 0.81 (0.50–1.32) | 0.414           | –                | –               |
| Physical activity, MET–h/week            | 0.99 (0.98–1.01) | 0.538           | –                | –               |
| TG, mg/dL                                | 1.00 (1.00–1.00) | 0.001           | 1.00 (1.00–1.00) | 0.035           |
| T-Chol, mg/dL                            | 1.00 (0.99–1.01) | 0.520           | –                | –               |
| Albumin, g/dL                            | 0.88 (0.41–1.85) | 0.738           | –                | –               |
| Urine potassium, mmol/L                  | 1.00 (0.99–1.01) | 0.178           | –                | –               |
| HOMA-IR                                  | 1.10 (1.01–1.19) | 0.016           | –                | –               |
| eGFR, CKD-EPI, ml/min/1.73m <sup>2</sup> | 0.96 (0.95–0.97) | < 0.001         | 0.96 (0.95–0.98) | < 0.001         |
| Hypertension, <i>n</i> (%)               | 1.97 (1.36–2.83) | <0.001          | 1.53 (1.05–2.23) | 0.026           |
| Diabetes mellitus, <i>n</i> (%)          | 2.71 (1.41–5.18) | 0.003           | –                | –               |
| Hyperlipidemia, <i>n</i> (%)             | 1.18 (0.82–1.70) | 0.363           | –                | –               |
| Postmenopausal, <i>n</i> (%)             | 2.32 (1.35–3.99) | 0.002           | 1.36 (0.77–2.40) | 0.288           |
| Total energy, kcal                       | 1.00 (0.99–1.00) | 0.400           | –                | –               |
| Protein, g                               | 1.00 (0.99–1.00) | 0.542           | –                | –               |
| Fat, g                                   | 1.00 (0.99–1.00) | 0.914           | –                | –               |
| Carbohydrate, g                          | 1.00 (0.99–1.00) | 0.298           | –                | –               |

Variables with *p*-values < 0.10 in the univariate analysis were included in the multivariate analysis. Age, BMI, and DM were not considered in multivariate analysis because they were used for NAFLD and hepatic fibrosis classification.

HR, hazard ratio; CI, confidence interval; BMI, body mass index; eGFR, estimated glomerular filtration rate; CKD-EPI, chronic kidney disease epidemiology collaboration; HOMA-IR, homeostasis model assessment of insulin resistance; MET, metabolic equivalent of task; AST, aspartate aminotransferase; ALT, alanine aminotransferase; TG, triglyceride; T-Chol, total cholesterol

Table S7. Risk factors for the incidence of hepatic fibrosis in males (n = 1011) according to 24-hour urinary sodium excretion

|                                          | Univariate        |                 | Multivariate     |                 |
|------------------------------------------|-------------------|-----------------|------------------|-----------------|
|                                          | HR (95% CI)       | <i>p</i> -Value | HR (95% CI)      | <i>p</i> -Value |
| Age, yr                                  | 1.07 (1.03–1.11)  | < 0.001         | –                | –               |
| BMI, kg/m <sup>2</sup>                   | 1.64 (1.46–1.91)  | < 0.001         | –                | –               |
| Drinking status, <i>n</i> (%)            |                   |                 |                  |                 |
| Never                                    | Ref               |                 | –                | –               |
| Former                                   | 1.87 (0.74–4.73)  | 0.181           | –                | –               |
| Current                                  | 1.19 (0.55–2.54)  | 0.651           | –                | –               |
| Smoking status, <i>n</i> (%)             |                   |                 |                  |                 |
| Never                                    | Ref               |                 | –                | –               |
| Former                                   | 1.41 (0.63–3.10)  | 0.394           | –                | –               |
| Current                                  | 0.87 (0.40–1.89)  | 0.739           | –                | –               |
| Physical activity, MET-h/week            | 0.98 (0.97–1.00)  | 0.225           | –                | –               |
| TG, mg/dL                                | 1.00 (0.99–1.00)  | 0.006           | 1.00 (1.00–1.00) | 0.024           |
| T-Chol, mg/dL                            | 1.00 (0.99–1.01)  | 0.912           | –                | –               |
| Albumin, g/dL                            | 0.45 (0.14–1.42)  | 0.175           | –                | –               |
| Urine potassium, mmol/L                  | 1.00 (0.99–1.01)  | 0.272           | –                | –               |
| HOMA-IR                                  | 1.17 (1.03–1.33)  | 0.014           | 1.14 (0.98–1.33) | 0.076           |
| eGFR, CKD-EPI, ml/min/1.73m <sup>2</sup> | 0.96 (0.94–0.98)  | <0.001          | 0.95 (0.93–0.97) | < 0.001         |
| Hypertension, <i>n</i> (%)               | 1.73 (0.95–3.15)  | 0.069           | 1.46 (0.80–2.68) | 0.211           |
| Diabetes mellitus, <i>n</i> (%)          | 4.94 (2.37–10.29) | < 0.001         | –                | –               |
| Hyperlipidemia, <i>n</i> (%)             | 1.20 (0.65–2.18)  | 0.551           | –                | –               |
| Total energy, kcal                       | 0.99 (0.99–1.00)  | 0.494           | –                | –               |
| Protein, g                               | 0.99 (0.98–1.01)  | 0.640           | –                | –               |
| Fat, g                                   | 0.99 (0.97–1.01)  | 0.536           | –                | –               |
| Carbohydrate, g                          | 0.99 (0.99–1.00)  | 0.602           | –                | –               |

Variables with *p*-values < 0.10 in the univariate analysis were included in the multivariate analysis. Age, BMI, and DM were not considered in multivariate analysis because they were used for NAFLD and hepatic fibrosis classification.

HR, hazard ratio; CI, confidence interval; BMI, body mass index; eGFR, estimated glomerular filtration rate; CKD-EPI, chronic kidney disease epidemiology collaboration; HOMA-IR, homeostasis model assessment of insulin resistance; MET, metabolic equivalent of task; AST, aspartate aminotransferase; ALT, alanine aminotransferase; TG, triglyceride; T-Chol, total cholesterol

Table S8. Risk factors for the incidence of hepatic fibrosis in females ( $n = 1571$ ) according to 24-hour urinary sodium excretion

|                                          | Univariate       |                 | Multivariate     |                 |
|------------------------------------------|------------------|-----------------|------------------|-----------------|
|                                          | HR (95% CI)      | <i>p</i> -Value | HR (95% CI)      | <i>p</i> -Value |
| Age, yr                                  | 1.05 (1.03–1.08) | < 0.001         | –                | –               |
| BMI, kg/m <sup>2</sup>                   | 1.61 (1.42–1.82) | < 0.001         | –                | –               |
| Drinking status, <i>n</i> (%)            |                  |                 |                  |                 |
| Never                                    | Ref              |                 | –                | –               |
| Former                                   | –                | –               | –                | –               |
| Current                                  | 1.16 (0.68–1.95) | 0.573           | –                | –               |
| Smoking status, <i>n</i> (%)             |                  |                 |                  |                 |
| Never                                    | Ref              |                 | –                | –               |
| Former                                   | –                | –               | –                | –               |
| Current                                  | 0.94 (0.23–3.84) | 0.934           | –                | –               |
| Physical activity, MET–h/week            | 1.00 (0.98–1.01) | 0.806           | –                | –               |
| TG, mg/dL                                | 1.00 (0.99–1.00) | 0.089           | 1.00 (0.99–1.00) | 0.857           |
| T-Chol, mg/dL                            | 1.00 (0.99–1.00) | 0.474           | –                | –               |
| Albumin, g/dL                            | 1.57 (0.55–4.44) | 0.395           | –                | –               |
| Urine potassium, mmol/L                  | 1.00 (0.99–1.01) | 0.383           | –                | –               |
| HOMA–IR                                  | 1.07 (0.96–1.19) | 0.205           | –                | –               |
| eGFR, CKD–EPI, ml/min/1.73m <sup>2</sup> | 0.97 (0.95–0.98) | <0.001          | 0.97 (0.96–0.99) | 0.006           |
| Hypertension, <i>n</i> (%)               | 2.15 (1.35–3.41) | 0.001           | 1.66 (1.02–2.69) | 0.041           |
| Diabetes mellitus, <i>n</i> (%)          | 0.58 (0.08–4.19) | 0.592           | –                | –               |
| Hyperlipidemia, <i>n</i> (%)             | 1.18 (0.75–1.87) | 0.463           | –                | –               |
| Postmenopausal, <i>n</i> (%)             | 2.36 (1.37–4.05) | 0.002           | 1.54 (0.85–2.78) | 0.150           |
| Total energy, kcal                       | 1.00 (0.99–1.00) | 0.125           | –                | –               |
| Protein, g                               | 1.00 (0.98–1.00) | 0.303           | –                | –               |
| Fat, g                                   | 1.00 (0.99–1.01) | 0.551           | –                | –               |
| Carbohydrate, g                          | 1.00 (0.99–1.00) | 0.094           | –                | –               |

Variables with *p*-values < 0.10 in the univariate analysis were included in the multivariate analysis. Age, BMI, and DM were not considered in multivariate analysis because they were used for NAFLD and hepatic fibrosis classification.

HR, hazard ratio; CI, confidence interval; BMI, body mass index; eGFR, estimated glomerular filtration rate; CKD–EPI, chronic kidney disease epidemiology collaboration; HOMA–IR, homeostasis model assessment of insulin resistance; MET, metabolic equivalent of task; AST, aspartate aminotransferase; ALT, alanine aminotransferase; TG, triglyceride; T-Chol, total cholesterol
